# Supplementary material for: Unprecedented High-Resolution View of Bacterial Operon Architecture Revealed by RNA Sequencing
Source: PubMed Central journal article supplement — mBio. 2014 Jul 8;5(4):e01442-14. doi: 10.1128/mBio.01442-14 (PMC4161252; doi:10.1128/mbio.01442-14), 2014-07-08
Supplement: mbo004141900sf02.pdf [file mbo004141900sf02.pdf]

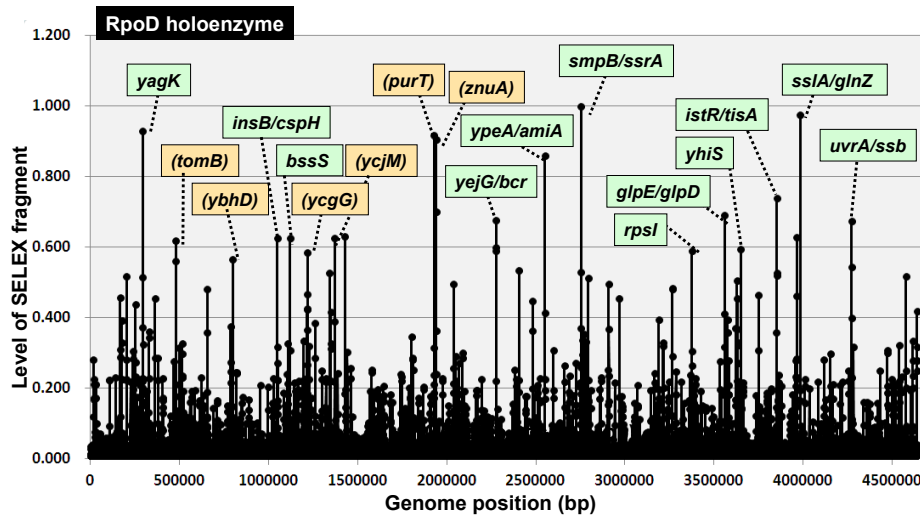

Fig.S2. Genomic Selex data for RpoD RNA polymerase holoenzyme binding in vitro. Line heights corresponding to binding values are shown according to their binding locations on the genome, in base pairs.
