# Supplementary material for: Unprecedented High-Resolution View of Bacterial Operon Architecture Revealed by RNA Sequencing
Source: PubMed Central journal article supplement — mBio. 2014 Jul 8;5(4):e01442-14. doi: 10.1128/mBio.01442-14 (PMC4161252; doi:10.1128/mbio.01442-14), 2014-07-08
Supplement: mbo004141900sf03.pdf [file mbo004141900sf03.pdf]

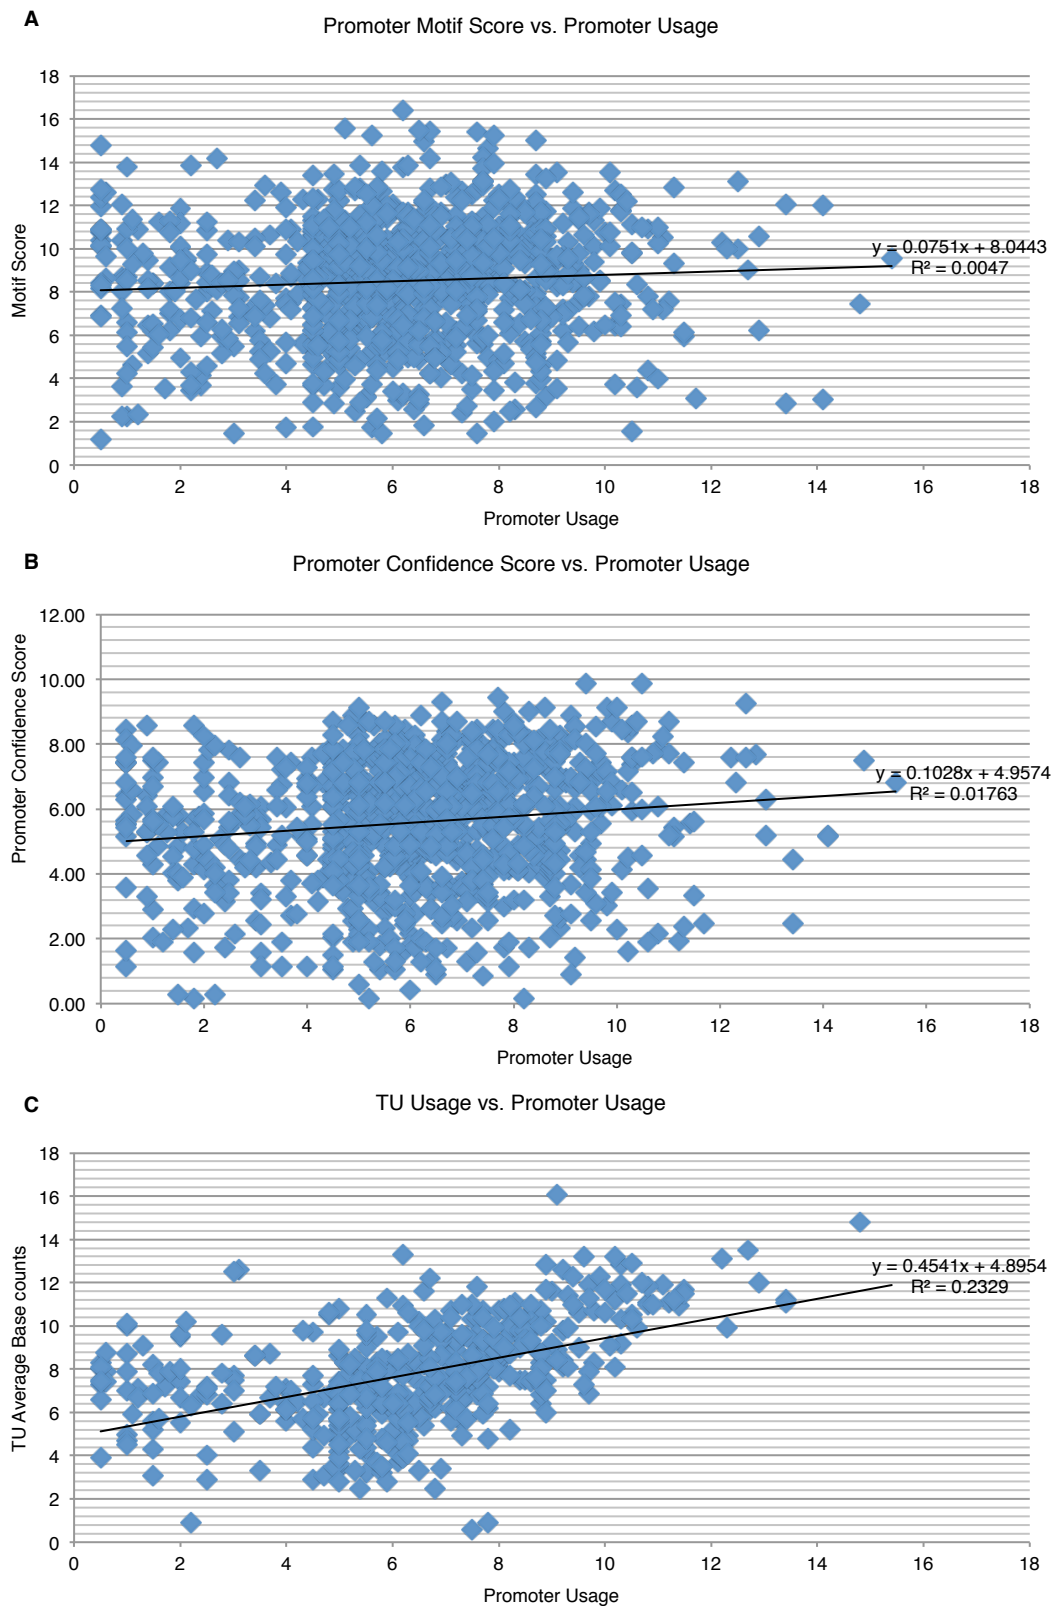

Fig. S3. Comparison of promoter usage to promoter metrics and TU usage. **A**, Promoter motif score vs. promoter usage. **B**, Promoter confidence score vs. promoter usage. **C**, and TU usage vs. promoter usage. Usage values were determined from normalized, log<sub>2</sub> base count data, as described in detail in the text and supplementary methods.
