# Supplementary material for: Unprecedented High-Resolution View of Bacterial Operon Architecture Revealed by RNA Sequencing
Source: PubMed Central journal article supplement — mBio. 2014 Jul 8;5(4):e01442-14. doi: 10.1128/mBio.01442-14 (PMC4161252; doi:10.1128/mbio.01442-14), 2014-07-08
Supplement: mbo004141900sf04.pdf [file mbo004141900sf04.pdf]

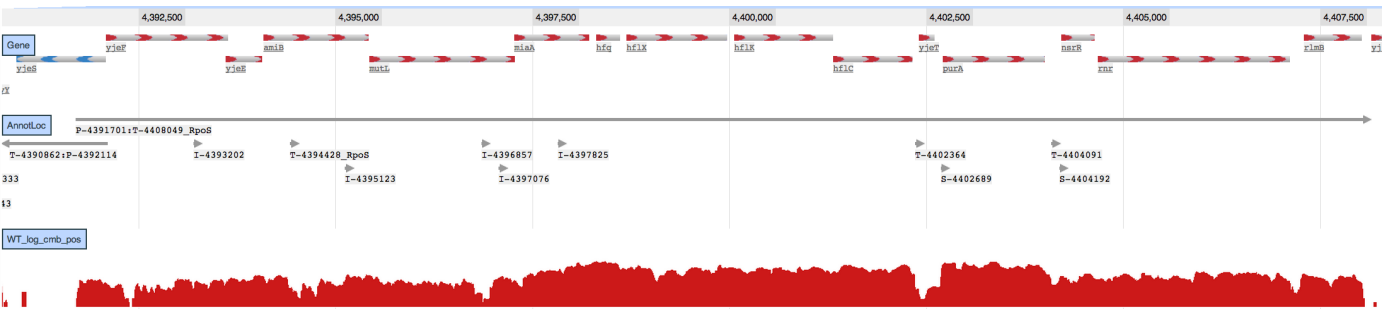

Fig. S4. Complex *yjeF-yjeE-amiB-mutL-miaA-hfq-hflX-hflK-hflC-yjeT-purA-nsrR-rnr-rlmB* operon. This operon has 8 promoters and 4 terminators, and contains 23 transcription units created by transcription initiation from S- and I-promoters, as well as termination and transcriptional read through at internal terminators.
